# Supplementary material
Source: Springer Nature journal article supplement (https://www.springermedizin.de/resource/supplementary/12916_2013_911_MOESM2_ESM.pdf/9598814)

InterVA-4

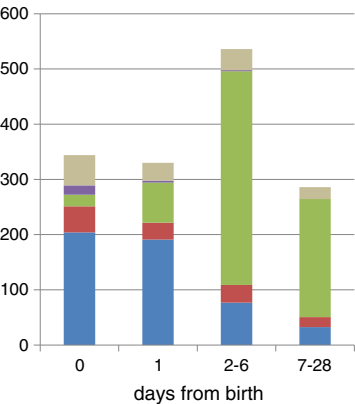

PHMRC

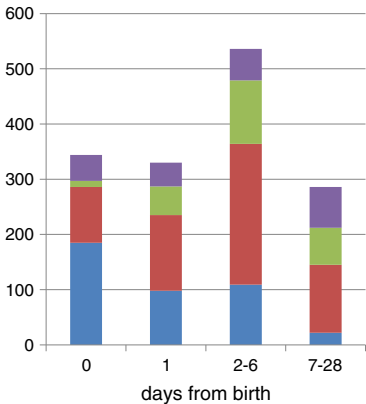

■ birth asphyxia    ■ prematurity    ■ infections  
■ congenital    ■ other/unknown

Supplement: MOESM2 [file 9598814]
